# Supplementary material for: De NovoAssembly and Characterization ofOryza officinalisLeaf Transcriptome by Using RNA-Seq
Source: Hindawi journal article supplement (doi:10.1155/2015/982065), 2015-01-01
Supplement: f1 [file 982065.f1.pdf]

TABLE S1: The unigenes related to disease resistance in *O. officinalis* leaf transcriptome

| Transcripts | Length<br>(bp) | Expression | ORF   |      |                |           | Rice genome (Os-Nipponbare-Reference-IRGSP-1.0) |          |       |           |                                     |
|-------------|----------------|------------|-------|------|----------------|-----------|-------------------------------------------------|----------|-------|-----------|-------------------------------------|
|             |                |            | Start | End  | Length<br>(bp) | GC<br>(%) | Best hits                                       | Identity | Score | E-value   | Annotation                          |
| Unigene_1   | 224            | 7          | 122   | 3    | 120            | 42.5      | LOC_Os12g17340.1                                | 97       | 396   | 1.00E-110 | CC-NBS-LRR resistance protein MLA13 |
| Unigene_2   | 351            | 15         | 36    | 350  | 315            | 44.44     | LOC_Os12g17340.1                                | 95       | 232   | 4.00E-60  | CC-NBS-LRR resistance protein MLA13 |
| Unigene_3   | 4233           | 1092       | 4027  | 563  | 3465           | 43.35     | LOC_Os12g32670.1                                | 84       | 2339  | 0         | CC-NBS-LRR resistance protein       |
| Unigene_4   | 4217           | 1108       | 4011  | 547  | 3465           | 43.35     | LOC_Os12g32670.1                                | 84       | 2339  | 0         | CC-NBS-LRR resistance protein       |
| Unigene_5   | 244            | 9          | 198   | 1    | 198            | 39.39     | LOC_Os08g16580.1                                | 89       | 270   | 1.00E-71  | Cf2/Cf5 disease resistance protein  |
| Unigene_6   | 201            | 6          | 43    | 189  | 147            | 39.46     | LOC_Os05g41310.1                                | 98       | 375   | 1.00E-103 | Disease resistance protein RGA2     |
| Unigene_7   | 224            | 9          | 109   | 222  | 114            | 56.14     | LOC_Os05g41310.1                                | 96       | 198   | 3.00E-50  | Disease resistance protein RGA2     |
| Unigene_8   | 3189           | 975        | 178   | 3189 | 3012           | 41.77     | LOC_Os02g18000.1                                | 81       | 868   | 0         | Disease resistance protein RGA2     |
| Unigene_9   | 234            | 5          | 131   | 21   | 111            | 44.14     | LOC_Os05g41310.1                                | 97       | 416   | 1.00E-116 | Disease resistance protein RGA2     |
| Unigene_10  | 532            | 13         | 178   | 531  | 354            | 40.68     | LOC_Os05g41310.1                                | 95       | 848   | 0         | Disease resistance protein RGA2     |
| Unigene_11  | 955            | 66         | 580   | 200  | 381            | 51.44     | LOC_Os08g12740.1                                | 98       | 190   | 4.00E-47  | Disease resistance protein RGA3     |
| Unigene_12  | 242            | 6          | 24    | 242  | 219            | 40.18     | LOC_Os12g29280.1                                | 97       | 440   | 1.00E-123 | Disease resistance protein RGA3     |
| Unigene_13  | 256            | 4          | 59    | 256  | 198            | 40.91     | LOC_Os12g29280.1                                | 98       | 476   | 1.00E-133 | Disease resistance protein RGA3     |
| Unigene_14  | 1611           | 398        | 1479  | 1    | 1479           | 40.43     | LOC_Os06g47800.1                                | 90       | 1909  | 0         | Disease resistance protein RGA3     |
| Unigene_15  | 257            | 3          | 45    | 200  | 156            | 39.1      | LOC_Os12g29290.1                                | 95       | 242   | 3.00E-63  | Disease resistance protein RGA3     |
| Unigene_16  | 2581           | 272        | 69    | 1889 | 1821           | 49.92     | LOC_Os05g34230.1                                | 90       | 2446  | 0         | Disease resistance protein RGA3     |
| Unigene_17  | 1226           | 136        | 1153  | 2    | 1152           | 47.22     | LOC_Os11g10770.1                                | 85       | 208   | 2.00E-52  | Disease resistance protein RGA3     |
| Unigene_18  | 2883           | 305        | 340   | 2562 | 2223           | 40.71     | LOC_Os11g10770.1                                | 80       | 103   | 2.00E-20  | Disease resistance protein RGA3     |
| Unigene_19  | 517            | 21         | 39    | 272  | 234            | 58.12     | LOC_Os12g29280.1                                | 97       | 172   | 5.00E-42  | Disease resistance protein RGA3     |
| Unigene_20  | 252            | 10         | 60    | 251  | 192            | 40.62     | LOC_Os01g71114.1                                | 98       | 472   | 1.00E-132 | Disease resistance protein RGA4     |

|            |      |     |      |      |      |       |                  |    |      |           |                                 |
|------------|------|-----|------|------|------|-------|------------------|----|------|-----------|---------------------------------|
| Unigene_21 | 4478 | 634 | 4447 | 674  | 3774 | 43.16 | LOC_Os05g31550.1 | 90 | 2095 | 0         | Disease resistance protein RGA4 |
| Unigene_22 | 237  | 6   | 223  | 2    | 222  | 54.5  | LOC_Os01g71114.1 | 97 | 414  | 1.00E-115 | Disease resistance protein RGA4 |
| Unigene_23 | 255  | 5   | 98   | 199  | 102  | 36.27 | LOC_Os01g36640.1 | 96 | 424  | 1.00E-118 | Disease resistance protein RPM1 |
| Unigene_24 | 382  | 12  | 15   | 380  | 366  | 37.43 | LOC_Os09g09490.1 | 96 | 662  | 0         | Disease resistance protein RPM1 |
| Unigene_25 | 485  | 18  | 67   | 483  | 417  | 39.33 | LOC_Os09g09490.1 | 96 | 835  | 0         | Disease resistance protein RPM1 |
| Unigene_26 | 3216 | 340 | 27   | 2834 | 2808 | 51.25 | LOC_Os08g09430.1 | 83 | 1136 | 0         | Disease resistance protein RPM1 |
| Unigene_27 | 3405 | 368 | 27   | 2924 | 2898 | 51    | LOC_Os08g09430.1 | 83 | 1136 | 0         | Disease resistance protein RPM1 |
| Unigene_28 | 435  | 16  | 414  | 238  | 177  | 44.63 | LOC_Os09g09490.1 | 97 | 234  | 1.00E-60  | Disease resistance protein RPM1 |
| Unigene_29 | 207  | 5   |      |      |      |       | LOC_Os09g09490.1 | 95 | 337  | 5.00E-92  | Disease resistance protein RPM1 |
| Unigene_30 | 638  | 27  | 510  | 1    | 510  | 40.98 | LOC_Os09g09490.1 | 97 | 1146 | 0         | Disease resistance protein RPM1 |
| Unigene_31 | 483  | 31  | 315  | 482  | 168  | 44.64 | LOC_Os11g12330.1 | 84 | 89.7 | 5.00E-17  | Disease resistance protein RPM1 |
| Unigene_32 | 644  | 42  | 559  | 128  | 432  | 47.92 | LOC_Os11g12340.2 | 82 | 77.8 | 3.00E-13  | Disease resistance protein RPM1 |
| Unigene_33 | 1811 | 92  | 1740 | 1    | 1740 | 45.92 | LOC_Os11g11950.1 | 79 | 117  | 9.00E-25  | Disease resistance protein RPM1 |
| Unigene_34 | 213  | 5   |      |      |      |       | LOC_Os11g12320.1 | 98 | 391  | 1.00E-108 | Disease resistance protein RPM1 |
| Unigene_35 | 2308 | 172 | 1768 | 2    | 1767 | 42.9  | LOC_Os12g31620.1 | 78 | 280  | 1.00E-73  | Disease resistance protein RPM1 |
| Unigene_36 | 226  | 9   | 49   | 225  | 177  | 36.16 | LOC_Os12g31620.1 | 83 | 54   | 1.00E-06  | Disease resistance protein RPM1 |
| Unigene_37 | 269  | 6   | 169  | 62   | 108  | 38.89 | LOC_Os09g30220.1 | 95 | 448  | 1.00E-125 | Disease resistance protein RPM1 |
| Unigene_38 | 260  | 7   | 57   | 260  | 204  | 40.2  | LOC_Os07g08890.1 | 92 | 351  | 5.00E-96  | Disease resistance protein RPM1 |
| Unigene_39 | 433  | 10  | 5    | 430  | 426  | 41.08 | LOC_Os07g08890.1 | 96 | 733  | 0         | Disease resistance protein RPM1 |
| Unigene_40 | 475  | 14  | 376  | 56   | 321  | 46.73 | LOC_Os08g07774.2 | 89 | 58   | 2.00E-07  | Disease resistance protein RPM1 |
| Unigene_41 | 801  | 43  | 178  | 2    | 177  | 44.63 | LOC_Os08g32890.1 | 97 | 375  | 1.00E-102 | Disease resistance protein RPM1 |
| Unigene_42 | 279  | 6   | 270  | 1    | 270  | 42.59 | LOC_Os04g21890.1 | 96 | 482  | 1.00E-135 | Disease resistance protein RPM1 |
| Unigene_43 | 282  | 8   | 146  | 280  | 135  | 37.04 | LOC_Os04g21890.1 | 95 | 456  | 1.00E-127 | Disease resistance protein RPM1 |
| Unigene_44 | 583  | 14  | 295  | 2    | 294  | 46.94 | LOC_Os11g11770.1 | 91 | 747  | 0         | Disease resistance protein RPM1 |
| Unigene_45 | 245  | 7   |      |      |      |       | LOC_Os11g11770.1 | 96 | 414  | 1.00E-115 | Disease resistance protein RPM1 |

|            |      |     |      |      |      |       |                  |    |      |           |                                 |
|------------|------|-----|------|------|------|-------|------------------|----|------|-----------|---------------------------------|
| Unigene_46 | 849  | 30  | 554  | 3    | 552  | 44.57 | LOC_Os11g11770.1 | 94 | 1314 | 0         | Disease resistance protein RPM1 |
| Unigene_47 | 762  | 39  | 31   | 594  | 564  | 45.92 | LOC_Os11g11770.1 | 94 | 954  | 0         | Disease resistance protein RPM1 |
| Unigene_48 | 775  | 34  | 180  | 413  | 234  | 48.72 | LOC_Os10g21400.1 | 83 | 105  | 1.00E-21  | Disease resistance protein RPM1 |
| Unigene_49 | 334  | 15  | 65   | 334  | 270  | 54.81 | LOC_Os07g08890.1 | 92 | 438  | 1.00E-122 | Disease resistance protein RPM1 |
| Unigene_50 | 216  | 8   | 185  | 3    | 183  | 50.82 | LOC_Os07g08890.1 | 93 | 303  | 8.00E-82  | Disease resistance protein RPM1 |
| Unigene_51 | 1159 | 80  | 143  | 1159 | 1017 | 40.81 | LOC_Os10g07534.1 | 82 | 58   | 4.00E-07  | Disease resistance protein RPM1 |
| Unigene_52 | 1009 | 68  | 143  | 1009 | 867  | 41.41 | LOC_Os10g07534.1 | 82 | 58   | 4.00E-07  | Disease resistance protein RPM1 |
| Unigene_53 | 367  | 18  | 101  | 367  | 267  | 46.44 | LOC_Os01g36640.1 | 82 | 77.8 | 1.00E-13  | Disease resistance protein RPM1 |
| Unigene_54 | 398  | 14  | 72   | 263  | 192  | 50    | LOC_Os11g12330.1 | 93 | 587  | 1.00E-167 | Disease resistance protein RPM1 |
| Unigene_55 | 730  | 32  | 68   | 730  | 663  | 45.25 | LOC_Os11g12340.2 | 96 | 1233 | 0         | Disease resistance protein RPM1 |
| Unigene_56 | 583  | 20  | 389  | 583  | 195  | 47.18 | LOC_Os11g12340.2 | 95 | 617  | 1.00E-175 | Disease resistance protein RPM1 |
| Unigene_57 | 2426 | 177 | 2358 | 397  | 1962 | 41.59 | LOC_Os02g09790.1 | 87 | 2272 | 0         | Disease resistance protein RPM1 |
| Unigene_58 | 388  | 19  | 270  | 1    | 270  | 40.37 | LOC_Os02g09790.1 | 85 | 307  | 9.00E-83  | Disease resistance protein RPM1 |
| Unigene_59 | 262  | 11  |      |      |      |       | LOC_Os02g09790.1 | 87 | 65.9 | 4.00E-10  | Disease resistance protein RPM1 |
| Unigene_60 | 2373 | 197 | 2147 | 3    | 2145 | 46.06 | LOC_Os10g21400.1 | 86 | 343  | 1.00E-92  | Disease resistance protein RPM1 |
| Unigene_61 | 2316 | 189 | 2147 | 3    | 2145 | 46.06 | LOC_Os10g21400.1 | 86 | 343  | 1.00E-92  | Disease resistance protein RPM1 |
| Unigene_62 | 2282 | 512 | 2202 | 244  | 1959 | 42.16 | LOC_Os11g41170.1 | 96 | 2789 | 0         | Disease resistance protein RPM1 |
| Unigene_63 | 3656 | 685 | 3117 | 244  | 2874 | 43.7  | LOC_Os11g41170.1 | 96 | 2789 | 0         | Disease resistance protein RPM1 |
| Unigene_64 | 3524 | 672 | 3117 | 244  | 2874 | 43.7  | LOC_Os11g41170.1 | 96 | 2789 | 0         | Disease resistance protein RPM1 |
| Unigene_65 | 817  | 62  | 51   | 608  | 558  | 47.31 | LOC_Os11g11950.1 | 95 | 422  | 1.00E-117 | Disease resistance protein RPM1 |
| Unigene_66 | 793  | 70  | 85   | 792  | 708  | 42.8  | LOC_Os11g11950.1 | 95 | 1277 | 0         | Disease resistance protein RPM1 |
| Unigene_67 | 2075 | 298 | 160  | 1182 | 1023 | 43.21 | LOC_Os11g11960.1 | 95 | 2791 | 0         | Disease resistance protein RPM1 |
| Unigene_68 | 1304 | 73  | 347  | 1303 | 957  | 42.22 | LOC_Os11g11950.1 | 97 | 1076 | 0         | Disease resistance protein RPM1 |
| Unigene_69 | 3437 | 806 | 501  | 3269 | 2769 | 43.91 | LOC_Os10g07978.2 | 94 | 4605 | 0         | Disease resistance protein RPM1 |
| Unigene_70 | 3564 | 810 | 628  | 3396 | 2769 | 43.91 | LOC_Os10g07978.1 | 93 | 5134 | 0         | Disease resistance protein RPM1 |

|            |      |      |      |      |      |       |                  |    |      |           |                                 |
|------------|------|------|------|------|------|-------|------------------|----|------|-----------|---------------------------------|
| Unigene_71 | 3958 | 832  | 1022 | 3790 | 2769 | 43.91 | LOC_Os10g07978.1 | 93 | 5134 | 0         | Disease resistance protein RPM1 |
| Unigene_72 | 3831 | 828  | 895  | 3663 | 2769 | 43.91 | LOC_Os10g07978.2 | 94 | 4605 | 0         | Disease resistance protein RPM1 |
| Unigene_73 | 4833 | 1920 | 307  | 3276 | 2970 | 43.3  | LOC_Os06g17900.1 | 92 | 3610 | 0         | Disease resistance protein RPM1 |
| Unigene_74 | 5370 | 1982 | 985  | 3813 | 2829 | 42.38 | LOC_Os06g17900.1 | 92 | 3610 | 0         | Disease resistance protein RPM1 |
| Unigene_75 | 4817 | 1939 | 985  | 3813 | 2829 | 42.38 | LOC_Os06g17900.1 | 92 | 3610 | 0         | Disease resistance protein RPM1 |
| Unigene_76 | 4280 | 1877 | 307  | 3276 | 2970 | 43.3  | LOC_Os06g17900.1 | 92 | 3610 | 0         | Disease resistance protein RPM1 |
| Unigene_77 | 580  | 121  | 194  | 580  | 387  | 74.16 | LOC_Os08g28470.1 | 90 | 83.8 | 4.00E-15  | Disease resistance protein RPM1 |
| Unigene_78 | 752  | 29   | 81   | 752  | 672  | 40.33 | LOC_Os09g30220.1 | 96 | 1308 | 0         | Disease resistance protein RPM1 |
| Unigene_79 | 435  | 13   | 301  | 2    | 300  | 34.67 | LOC_Os09g30220.1 | 97 | 767  | 0         | Disease resistance protein RPM1 |
| Unigene_80 | 240  | 5    |      |      |      |       | LOC_Os09g30220.1 | 95 | 383  | 1.00E-105 | Disease resistance protein RPM1 |
| Unigene_81 | 305  | 9    |      |      |      |       | LOC_Os11g12340.2 | 90 | 357  | 9.00E-98  | Disease resistance protein RPM1 |
| Unigene_82 | 301  | 8    | 141  | 37   | 105  | 27.62 | LOC_Os11g12330.1 | 87 | 71.9 | 7.00E-12  | Disease resistance protein RPM1 |
| Unigene_83 | 256  | 7    | 24   | 161  | 138  | 52.9  | LOC_Os11g12330.1 | 92 | 232  | 3.00E-60  | Disease resistance protein RPM1 |
| Unigene_84 | 215  | 4    | 122  | 3    | 120  | 43.33 | LOC_Os09g30220.1 | 88 | 198  | 3.00E-50  | Disease resistance protein RPM1 |
| Unigene_85 | 361  | 9    | 170  | 361  | 192  | 44.27 | LOC_Os08g32890.1 | 98 | 365  | 1.00E-100 | Disease resistance protein RPM1 |
| Unigene_86 | 456  | 16   | 158  | 3    | 156  | 42.31 | LOC_Os07g08890.1 | 95 | 731  | 0         | Disease resistance protein RPM1 |
| Unigene_87 | 230  | 10   | 206  | 3    | 204  | 58.82 | LOC_Os01g57870.1 | 98 | 426  | 1.00E-119 | Disease resistance protein RPS2 |
| Unigene_88 | 207  | 6    |      |      |      |       | LOC_Os01g57870.1 | 97 | 363  | 1.00E-100 | Disease resistance protein RPS2 |
| Unigene_89 | 261  | 6    | 92   | 247  | 156  | 41.03 | LOC_Os01g57870.1 | 91 | 278  | 6.00E-74  | Disease resistance protein RPS2 |
| Unigene_90 | 246  | 5    | 7    | 246  | 240  | 58.33 | LOC_Os01g57870.1 | 98 | 464  | 1.00E-130 | Disease resistance protein RPS2 |
| Unigene_91 | 247  | 13   | 20   | 184  | 165  | 51.52 | LOC_Os01g57870.1 | 96 | 418  | 1.00E-116 | Disease resistance protein RPS2 |
| Unigene_92 | 282  | 15   | 19   | 282  | 264  | 45.45 | LOC_Os01g57870.1 | 96 | 472  | 1.00E-132 | Disease resistance protein RPS2 |
| Unigene_93 | 568  | 20   | 11   | 568  | 558  | 43.55 | LOC_Os01g57870.1 | 95 | 900  | 0         | Disease resistance protein RPS2 |
| Unigene_94 | 224  | 6    | 172  | 2    | 171  | 38.6  | LOC_Os12g30720.1 | 98 | 412  | 1.00E-114 | Disease resistance protein RPS2 |
| Unigene_95 | 315  | 7    | 194  | 3    | 192  | 46.35 | LOC_Os01g57870.1 | 99 | 601  | 1.00E-171 | Disease resistance protein RPS2 |

|             |      |      |      |      |      |       |                  |    |      |           |                                            |
|-------------|------|------|------|------|------|-------|------------------|----|------|-----------|--------------------------------------------|
| Unigene_96  | 850  | 25   | 83   | 793  | 711  | 40.65 | LOC_Os01g06836.1 | 89 | 440  | 1.00E-122 | Disease resistance protein slve2 precursor |
| Unigene_97  | 429  | 11   | 289  | 143  | 147  | 36.05 | LOC_Os01g06836.1 | 83 | 184  | 1.00E-45  | Disease resistance protein slve2 precursor |
| Unigene_98  | 312  | 9    | 216  | 1    | 216  | 43.98 | LOC_Os07g33720.1 | 92 | 248  | 6.00E-65  | Disease resistance protein                 |
| Unigene_99  | 224  | 7    | 213  | 1    | 213  | 47.89 | LOC_Os07g17220.2 | 97 | 396  | 1.00E-110 | Disease resistance protein                 |
| Unigene_100 | 365  | 8    | 42   | 365  | 324  | 43.21 | LOC_Os07g17220.2 | 96 | 636  | 0         | Disease resistance protein                 |
| Unigene_101 | 1018 | 39   | 178  | 855  | 678  | 44.69 | LOC_Os07g17220.2 | 92 | 1308 | 0         | Disease resistance protein                 |
| Unigene_102 | 447  | 42   | 244  | 77   | 168  | 55.95 | LOC_Os04g03180.1 | 91 | 157  | 2.00E-37  | Disease resistance protein                 |
| Unigene_103 | 2154 | 122  | 97   | 1146 | 1050 | 40.38 | LOC_Os01g58520.1 | 95 | 3394 | 0         | Disease resistance protein                 |
| Unigene_104 | 343  | 7    |      |      |      |       | LOC_Os01g06790.1 | 83 | 170  | 1.00E-41  | Disease resistance protein                 |
| Unigene_105 | 429  | 18   | 326  | 207  | 120  | 56.67 | LOC_Os01g06790.1 | 83 | 99.6 | 5.00E-20  | Disease resistance protein                 |
| Unigene_106 | 359  | 7    | 16   | 357  | 342  | 40.35 | LOC_Os12g30760.1 | 96 | 624  | 1.00E-178 | Disease resistance protein                 |
| Unigene_107 | 237  | 5    | 219  | 79   | 141  | 35.46 | LOC_Os12g39620.2 | 82 | 91.7 | 6.00E-18  | Disease resistance protein                 |
| Unigene_108 | 204  | 10   | 24   | 203  | 180  | 52.22 | LOC_Os03g36920.1 | 97 | 365  | 1.00E-100 | Disease resistance protein                 |
| Unigene_109 | 1942 | 139  | 61   | 1806 | 1746 | 45.53 | LOC_Os03g36920.1 | 97 | 3366 | 0         | Disease resistance protein                 |
| Unigene_110 | 206  | 6    |      |      |      |       | LOC_Os03g36920.1 | 98 | 167  | 1.00E-40  | Disease resistance protein                 |
| Unigene_111 | 374  | 13   | 207  | 1    | 207  | 42.51 | LOC_Os03g36920.1 | 96 | 646  | 0         | Disease resistance protein                 |
| Unigene_112 | 788  | 31   | 786  | 1    | 786  | 47.33 | LOC_Os03g36920.1 | 97 | 1386 | 0         | Disease resistance protein                 |
| Unigene_113 | 775  | 451  | 400  | 263  | 138  | 51.45 | LOC_Os04g03180.1 | 91 | 121  | 2.00E-26  | Disease resistance protein                 |
| Unigene_114 | 806  | 480  | 159  | 1    | 159  | 52.83 | LOC_Os04g03180.1 | 88 | 115  | 2.00E-24  | Disease resistance protein                 |
| Unigene_115 | 228  | 8    | 80   | 226  | 147  | 43.54 | LOC_Os12g30760.1 | 97 | 398  | 1.00E-110 | Disease resistance protein                 |
| Unigene_116 | 4722 | 909  | 4154 | 417  | 3738 | 45.45 | LOC_Os03g63240.1 | 90 | 2753 | 0         | Disease resistance protein                 |
| Unigene_117 | 4885 | 1021 | 4317 | 559  | 3759 | 45.68 | LOC_Os03g63240.1 | 90 | 2753 | 0         | Disease resistance protein                 |
| Unigene_118 | 4794 | 1031 | 4226 | 468  | 3759 | 45.68 | LOC_Os03g63240.1 | 90 | 2753 | 0         | Disease resistance protein                 |
| Unigene_119 | 703  | 34   | 122  | 469  | 348  | 46.55 | LOC_Os11g12350.1 | 94 | 714  | 0         | Disease resistance protein                 |
| Unigene_120 | 4793 | 4629 | 4651 | 2069 | 2583 | 58.15 | LOC_Os12g39620.3 | 94 | 4440 | 0         | Disease resistance protein                 |

|             |      |      |      |      |      |       |                  |    |      |           |                                         |
|-------------|------|------|------|------|------|-------|------------------|----|------|-----------|-----------------------------------------|
| Unigene_121 | 1008 | 237  | 866  | 12   | 855  | 73.33 | LOC_Os12g39620.1 | 93 | 638  | 0         | Disease resistance protein              |
| Unigene_122 | 4561 | 4543 | 4419 | 1837 | 2583 | 58.15 | LOC_Os12g39620.3 | 94 | 4440 | 0         | Disease resistance protein              |
| Unigene_123 | 605  | 21   | 447  | 88   | 360  | 54.72 | LOC_Os05g50790.1 | 89 | 129  | 8.00E-29  | Disease resistance protein              |
| Unigene_124 | 229  | 6    |      |      |      |       | LOC_Os01g58520.1 | 92 | 252  | 3.00E-66  | Disease resistance protein              |
| Unigene_125 | 202  | 5    |      |      |      |       | LOC_Os01g58520.1 | 92 | 153  | 2.00E-36  | Disease resistance protein              |
| Unigene_126 | 1865 | 159  | 404  | 1657 | 1254 | 41.31 | LOC_Os04g53050.1 | 84 | 749  | 0         | Disease resistance RPP13-like protein 1 |
| Unigene_127 | 286  | 6    | 232  | 2    | 231  | 41.13 | LOC_Os05g41290.1 | 92 | 188  | 4.00E-47  | Disease resistance RPP13-like protein 1 |
| Unigene_128 | 504  | 19   | 382  | 504  | 123  | 43.9  | LOC_Os01g57270.1 | 86 | 297  | 1.00E-79  | Disease resistance RPP13-like protein 1 |
| Unigene_129 | 458  | 13   | 7    | 456  | 450  | 40.89 | LOC_Os05g30220.1 | 93 | 640  | 0         | Disease resistance RPP13-like protein 1 |
| Unigene_130 | 293  | 6    | 7    | 291  | 285  | 43.16 | LOC_Os05g30220.1 | 92 | 283  | 1.00E-75  | Disease resistance RPP13-like protein 1 |
| Unigene_131 | 565  | 33   | 145  | 564  | 420  | 42.38 | LOC_Os05g41290.1 | 96 | 985  | 0         | Disease resistance RPP13-like protein 1 |
| Unigene_132 | 749  | 32   | 369  | 1    | 369  | 44.72 | LOC_Os05g41290.1 | 94 | 1072 | 0         | Disease resistance RPP13-like protein 1 |
| Unigene_133 | 1531 | 103  | 94   | 1380 | 1287 | 43.51 | LOC_Os05g30220.1 | 89 | 1695 | 0         | Disease resistance RPP13-like protein 1 |
| Unigene_134 | 515  | 28   | 10   | 513  | 504  | 39.09 | LOC_Os05g30220.1 | 93 | 763  | 0         | Disease resistance RPP13-like protein 1 |
| Unigene_135 | 467  | 26   | 289  | 11   | 279  | 49.46 | LOC_Os05g30220.1 | 91 | 236  | 3.00E-61  | Disease resistance RPP13-like protein 1 |
| Unigene_136 | 473  | 11   | 188  | 394  | 207  | 36.23 | LOC_Os10g04090.1 | 94 | 58   | 2.00E-07  | Disease resistance RPP13-like protein 1 |
| Unigene_137 | 1804 | 90   | 1417 | 101  | 1317 | 44.8  | LOC_Os03g38330.1 | 95 | 2997 | 0         | Disease resistance RPP13-like protein 1 |
| Unigene_138 | 203  | 7    |      |      |      |       | LOC_Os03g38330.1 | 97 | 363  | 1.00E-100 | Disease resistance RPP13-like protein 1 |
| Unigene_139 | 490  | 18   | 61   | 489  | 429  | 39.63 | LOC_Os03g38330.1 | 95 | 805  | 0         | Disease resistance RPP13-like protein 1 |
| Unigene_140 | 317  | 11   | 35   | 316  | 282  | 44.33 | LOC_Os03g38330.1 | 97 | 553  | 1.00E-157 | Disease resistance RPP13-like protein 1 |
| Unigene_141 | 218  | 6    | 24   | 218  | 195  | 53.85 | LOC_Os05g30220.1 | 92 | 295  | 2.00E-79  | Disease resistance RPP13-like protein 1 |
| Unigene_142 | 212  | 6    | 199  | 71   | 129  | 55.81 | LOC_Os05g30220.1 | 92 | 95.6 | 4.00E-19  | Disease resistance RPP13-like protein 1 |
| Unigene_143 | 834  | 35   | 599  | 832  | 234  | 44.87 | LOC_Os01g57270.1 | 81 | 379  | 1.00E-104 | Disease resistance RPP13-like protein 1 |
| Unigene_144 | 213  | 6    | 70   | 213  | 144  | 48.61 | LOC_Os01g57270.1 | 89 | 178  | 3.00E-44  | Disease resistance RPP13-like protein 1 |
| Unigene_145 | 211  | 5    | 28   | 138  | 111  | 45.95 | LOC_Os01g57270.1 | 85 | 67.9 | 8.00E-11  | Disease resistance RPP13-like protein 1 |

|             |      |     |      |      |      |       |                  |    |      |           |                                                                               |
|-------------|------|-----|------|------|------|-------|------------------|----|------|-----------|-------------------------------------------------------------------------------|
| Unigene_146 | 393  | 11  | 163  | 2    | 162  | 58.02 | LOC_Os01g57270.1 | 85 | 133  | 3.00E-30  | Disease resistance RPP13-like protein 1                                       |
| Unigene_147 | 508  | 13  | 179  | 508  | 330  | 46.97 | LOC_Os12g32790.1 | 88 | 54   | 3.00E-06  | Disease resistance RPP13-like protein 1                                       |
| Unigene_148 | 272  | 5   | 250  | 2    | 249  | 52.21 | LOC_Os10g04090.1 | 90 | 307  | 6.00E-83  | Disease resistance RPP13-like protein 1                                       |
| Unigene_149 | 210  | 1   | 210  | 1    | 210  | 50.95 | LOC_Os10g04090.1 | 90 | 258  | 5.00E-68  | Disease resistance RPP13-like protein 1                                       |
| Unigene_150 | 879  | 90  | 510  | 355  | 156  | 34.62 | LOC_Os10g04090.1 | 95 | 63.9 | 5.00E-09  | Disease resistance RPP13-like protein 1                                       |
| Unigene_151 | 2986 | 327 | 2889 | 1216 | 1674 | 45.46 | LOC_Os04g43340.1 | 97 | 4732 | 0         | Disease resistance RPP13-like protein 1                                       |
| Unigene_152 | 1912 | 281 | 1162 | 326  | 837  | 42.41 | LOC_Os04g43340.1 | 96 | 1403 | 0         | Disease resistance RPP13-like protein 1                                       |
| Unigene_153 | 1456 | 79  | 1359 | 274  | 1086 | 47.79 | LOC_Os04g43340.1 | 97 | 2087 | 0         | Disease resistance RPP13-like protein 1                                       |
| Unigene_154 | 1738 | 248 | 1209 | 259  | 951  | 43.32 | LOC_Os04g43340.1 | 97 | 2218 | 0         | Disease resistance RPP13-like protein 1                                       |
| Unigene_155 | 1991 | 286 | 1462 | 326  | 1137 | 42.74 | LOC_Os04g43340.1 | 96 | 2355 | 0         | Disease resistance RPP13-like protein 1                                       |
| Unigene_156 | 2907 | 322 | 2810 | 1137 | 1674 | 45.46 | LOC_Os04g43340.1 | 97 | 3372 | 0         | Disease resistance RPP13-like protein 1                                       |
| Unigene_157 | 3160 | 360 | 3063 | 1390 | 1674 | 45.46 | LOC_Os04g43340.1 | 97 | 3372 | 0         | Disease resistance RPP13-like protein 1                                       |
| Unigene_158 | 1659 | 243 | 909  | 259  | 651  | 43.16 | LOC_Os04g43340.1 | 97 | 1267 | 0         | Disease resistance RPP13-like protein 1                                       |
| Unigene_159 | 3239 | 365 | 3142 | 1469 | 1674 | 45.46 | LOC_Os04g43340.1 | 96 | 4869 | 0         | Disease resistance RPP13-like protein 1                                       |
| Unigene_160 | 422  | 20  | 414  | 97   | 318  | 68.24 | LOC_Os04g43340.1 | 92 | 406  | 1.00E-112 | Disease resistance RPP13-like protein 1                                       |
| Unigene_161 | 452  | 20  |      |      |      |       | LOC_Os10g04090.1 | 85 | 58   | 2.00E-07  | Disease resistance RPP13-like protein 1                                       |
| Unigene_162 | 339  | 10  |      |      |      |       | LOC_Os09g20030.1 | 82 | 127  | 2.00E-28  | Disease resistance RPP13-like protein 1                                       |
| Unigene_163 | 654  | 33  | 245  | 652  | 408  | 65.2  | LOC_Os03g48370.1 | 87 | 105  | 1.00E-21  | Disease resistance RPP13-like protein 1                                       |
| Unigene_164 | 994  | 42  | 695  | 3    | 693  | 45.89 | LOC_Os05g41290.1 | 95 | 1245 | 0         | Disease resistance RPP13-like protein 1                                       |
| Unigene_165 | 668  | 16  | 232  | 666  | 435  | 40.46 | LOC_Os10g04090.1 | 89 | 773  | 0         | Disease resistance RPP13-like protein 1                                       |
| Unigene_166 | 1859 | 114 | 125  | 1585 | 1461 | 43.53 | LOC_Os09g20030.1 | 91 | 2143 | 0         | Disease resistance RPP13-like protein 1                                       |
| Unigene_167 | 521  | 22  | 21   | 521  | 501  | 42.51 | LOC_Os03g20840.1 | 97 | 934  | 0         | Disease resistance RPP13-like protein 1                                       |
| Unigene_168 | 779  | 56  | 680  | 3    | 678  | 67.7  | LOC_Os02g47230.1 | 96 | 1176 | 0         | Disease resistance/zinc finger/chromosome<br>condensation-like region protein |
| Unigene_169 | 535  | 37  | 210  | 422  | 213  | 70.42 | LOC_Os02g47230.1 | 95 | 771  | 0         | Disease resistance/zinc finger/chromosome                                     |

|             |      |     |     |      |      |       |                  |    |      |          |                                                     |
|-------------|------|-----|-----|------|------|-------|------------------|----|------|----------|-----------------------------------------------------|
|             |      |     |     |      |      |       |                  |    |      |          | condensation-like region protein                    |
| Unigene_170 | 1383 | 133 | 91  | 1077 | 987  | 45.49 | LOC_Os03g11340.1 | 95 | 2268 | 0        | Leucine-rich repeat resistance protein              |
| Unigene_171 | 1030 | 72  | 22  | 984  | 963  | 49.12 | LOC_Os02g16070.1 | 84 | 325  | 1.00E-87 | Lr1 disease resistance protein                      |
| Unigene_172 | 429  | 23  | 345 | 1    | 345  | 43.77 | LOC_Os02g16070.1 | 86 | 359  | 3.00E-98 | Lr1 disease resistance protein                      |
| Unigene_173 | 1818 | 295 | 93  | 1619 | 1527 | 47.68 | LOC_Os12g25170.1 | 92 | 2440 | 0        | NB-ARC domain containing disease resistance protein |
| Unigene_174 | 217  | 16  |     |      |      |       | LOC_Os02g10580.1 | 90 | 232  | 2.00E-60 | NB-ARC domain containing disease resistance protein |
| Unigene_175 | 3135 | 730 | 384 | 1460 | 1077 | 67.69 | LOC_Os02g10580.1 | 91 | 2008 | 0        | NB-ARC domain containing disease resistance protein |
| Unigene_176 | 2967 | 720 | 384 | 1460 | 1077 | 67.69 | LOC_Os02g10580.1 | 91 | 2008 | 0        | NB-ARC domain containing disease resistance protein |
| Unigene_177 | 2893 | 750 | 384 | 1460 | 1077 | 67.69 | LOC_Os02g10580.1 | 91 | 2008 | 0        | NB-ARC domain containing disease resistance protein |
| Unigene_178 | 3159 | 679 | 384 | 1460 | 1077 | 67.69 | LOC_Os02g10580.1 | 91 | 2008 | 0        | NB-ARC domain containing disease resistance protein |
| Unigene_179 | 2725 | 740 | 384 | 1460 | 1077 | 67.69 | LOC_Os02g10580.1 | 91 | 2008 | 0        | NB-ARC domain containing disease resistance protein |
| Unigene_180 | 2917 | 699 | 384 | 1460 | 1077 | 67.69 | LOC_Os02g10580.1 | 91 | 2008 | 0        | NB-ARC domain containing disease resistance protein |
| Unigene_181 | 2991 | 669 | 384 | 1460 | 1077 | 67.69 | LOC_Os02g10580.1 | 91 | 2008 | 0        | NB-ARC domain containing disease resistance protein |
| Unigene_182 | 2749 | 689 | 384 | 1460 | 1077 | 67.69 | LOC_Os02g10580.1 | 91 | 2008 | 0        | NB-ARC domain containing disease resistance protein |
| Unigene_183 | 513  | 15  | 147 | 512  | 366  | 69.95 | LOC_Os03g14900.1 | 97 | 898  | 0        | NB-ARC/LRR disease resistance protein               |



|             |      |     |      |      |      |       |                  |    |      |           |                                       |
|-------------|------|-----|------|------|------|-------|------------------|----|------|-----------|---------------------------------------|
| Unigene_184 | 205  | 10  | 7    | 204  | 198  | 62.12 | LOC_Os03g14900.1 | 95 | 335  | 2.00E-91  | NB-ARC/LRR disease resistance protein |
| Unigene_185 | 330  | 10  | 39   | 329  | 291  | 66.67 | LOC_Os03g14900.1 | 96 | 551  | 1.00E-156 | NB-ARC/LRR disease resistance protein |
| Unigene_186 | 247  | 9   | 242  | 3    | 240  | 61.67 | LOC_Os03g14900.1 | 94 | 387  | 1.00E-107 | NB-ARC/LRR disease resistance protein |
| Unigene_187 | 843  | 47  | 12   | 704  | 693  | 72.01 | LOC_Os03g14900.1 | 94 | 1352 | 0         | NB-ARC/LRR disease resistance protein |
| Unigene_188 | 3617 | 478 | 2996 | 261  | 2736 | 41.52 | LOC_Os01g58530.1 | 88 | 1857 | 0         | NB-ARC/LRR disease resistance protein |
| Unigene_189 | 1263 | 121 | 812  | 132  | 681  | 67.4  | LOC_Os03g14900.1 | 94 | 311  | 2.00E-83  | NB-ARC/LRR disease resistance protein |
| Unigene_190 | 1292 | 123 | 812  | 132  | 681  | 67.4  | LOC_Os03g14900.1 | 92 | 636  | 0         | NB-ARC/LRR disease resistance protein |
| Unigene_191 | 636  | 29  | 395  | 3    | 393  | 43    | LOC_Os06g20050.1 | 94 | 944  | 0         | NBS type disease resistance protein   |
| Unigene_192 | 306  | 7   | 113  | 304  | 192  | 43.23 | LOC_Os06g20050.1 | 79 | 61.9 | 7.00E-09  | NBS type disease resistance protein   |
| Unigene_193 | 245  | 8   |      |      |      |       | LOC_Os06g20050.1 | 93 | 355  | 3.00E-97  | NBS type disease resistance protein   |
| Unigene_194 | 920  | 46  | 142  | 360  | 219  | 41.55 | LOC_Os02g18140.1 | 86 | 63.9 | 6.00E-09  | NBS type disease resistance protein   |
| Unigene_195 | 739  | 35  | 70   | 738  | 669  | 38.71 | LOC_Os06g20050.1 | 92 | 1003 | 0         | NBS type disease resistance protein   |
| Unigene_196 | 445  | 10  | 311  | 3    | 309  | 39.81 | LOC_Os01g72390.1 | 96 | 763  | 0         | NBS type disease resistance protein   |
| Unigene_197 | 458  | 31  | 267  | 1    | 267  | 41.2  | LOC_Os06g20050.1 | 98 | 837  | 0         | NBS type disease resistance protein   |
| Unigene_198 | 391  | 15  | 111  | 389  | 279  | 62.72 | LOC_Os04g53160.1 | 92 | 254  | 1.00E-66  | NBS-LRR disease resistance protein    |
| Unigene_199 | 274  | 7   | 5    | 274  | 270  | 38.89 | LOC_Os02g02670.1 | 83 | 194  | 7.00E-49  | NBS-LRR disease resistance protein    |
| Unigene_200 | 288  | 6   |      |      |      |       | LOC_Os02g02640.1 | 89 | 333  | 1.00E-90  | NBS-LRR disease resistance protein    |
| Unigene_201 | 333  | 11  | 317  | 3    | 315  | 41.9  | LOC_Os02g02670.1 | 88 | 228  | 6.00E-59  | NBS-LRR disease resistance protein    |
| Unigene_202 | 570  | 23  | 64   | 570  | 507  | 46.75 | LOC_Os04g52970.1 | 96 | 858  | 0         | NBS-LRR disease resistance protein    |
| Unigene_203 | 415  | 11  | 76   | 414  | 339  | 38.64 | LOC_Os06g49380.3 | 90 | 476  | 1.00E-133 | NBS-LRR disease resistance protein    |
| Unigene_204 | 509  | 20  |      |      |      |       | LOC_Os12g29710.1 | 95 | 165  | 1.00E-39  | NBS-LRR disease resistance protein    |
| Unigene_205 | 470  | 20  | 236  | 469  | 234  | 38.03 | LOC_Os09g15840.1 | 95 | 331  | 8.00E-90  | NBS-LRR disease resistance protein    |
| Unigene_206 | 432  | 17  | 419  | 3    | 417  | 44.36 | LOC_Os01g71106.2 | 93 | 630  | 1.00E-180 | NBS-LRR disease resistance protein    |
| Unigene_207 | 3497 | 503 | 105  | 2942 | 2838 | 44.15 | LOC_Os08g10260.1 | 94 | 4276 | 0         | NBS-LRR disease resistance protein    |
| Unigene_208 | 238  | 4   | 214  | 2    | 213  | 44.13 | LOC_Os07g29820.1 | 96 | 392  | 1.00E-108 | NBS-LRR disease resistance protein    |

|             |      |    |     |      |      |       |                  |    |      |           |                                    |
|-------------|------|----|-----|------|------|-------|------------------|----|------|-----------|------------------------------------|
| Unigene_209 | 1758 | 98 | 147 | 1574 | 1428 | 44.89 | LOC_Os12g09240.1 | 83 | 153  | 2.00E-35  | NBS-LRR disease resistance protein |
| Unigene_210 | 730  | 40 | 174 | 626  | 453  | 41.06 | LOC_Os12g09240.1 | 79 | 161  | 3.00E-38  | NBS-LRR disease resistance protein |
| Unigene_211 | 491  | 17 | 273 | 1    | 273  | 47.99 | LOC_Os09g34150.1 | 96 | 555  | 1.00E-157 | NBS-LRR disease resistance protein |
| Unigene_212 | 474  | 12 | 289 | 2    | 288  | 35.42 | LOC_Os04g52970.1 | 91 | 615  | 1.00E-175 | NBS-LRR disease resistance protein |
| Unigene_213 | 245  | 6  |     |      |      |       | LOC_Os04g52970.1 | 96 | 422  | 1.00E-117 | NBS-LRR disease resistance protein |
| Unigene_214 | 861  | 40 | 565 | 861  | 297  | 48.82 | LOC_Os04g53000.1 | 91 | 575  | 1.00E-163 | NBS-LRR disease resistance protein |
| Unigene_215 | 220  | 11 | 138 | 28   | 111  | 48.65 | LOC_Os04g53000.1 | 90 | 248  | 4.00E-65  | NBS-LRR disease resistance protein |
| Unigene_216 | 288  | 6  | 17  | 286  | 270  | 45.93 | LOC_Os04g52970.1 | 91 | 234  | 8.00E-61  | NBS-LRR disease resistance protein |
| Unigene_217 | 729  | 32 | 50  | 484  | 435  | 54.71 | LOC_Os06g49380.4 | 94 | 864  | 0         | NBS-LRR disease resistance protein |
| Unigene_218 | 290  | 6  | 105 | 1    | 105  | 46.67 | LOC_Os08g16450.1 | 92 | 58   | 1.00E-07  | NBS-LRR disease resistance protein |
| Unigene_219 | 276  | 6  | 136 | 276  | 141  | 39.72 | LOC_Os06g17910.1 | 85 | 285  | 2.00E-76  | NBS-LRR disease resistance protein |
| Unigene_220 | 216  | 5  | 168 | 37   | 132  | 60.61 | LOC_Os11g39160.1 | 92 | 54   | 1.00E-06  | NBS-LRR disease resistance protein |
| Unigene_221 | 281  | 6  | 228 | 106  | 123  | 36.59 | LOC_Os10g25487.1 | 91 | 319  | 2.00E-86  | NBS-LRR disease resistance protein |
| Unigene_222 | 1082 | 56 | 230 | 1081 | 852  | 42.14 | LOC_Os08g19980.1 | 96 | 1826 | 0         | NBS-LRR disease resistance protein |
| Unigene_223 | 234  | 7  | 36  | 233  | 198  | 37.37 | LOC_Os08g19980.1 | 97 | 408  | 1.00E-113 | NBS-LRR disease resistance protein |
| Unigene_224 | 420  | 21 | 390 | 94   | 297  | 39.06 | LOC_Os08g19980.1 | 93 | 609  | 1.00E-173 | NBS-LRR disease resistance protein |
| Unigene_225 | 686  | 65 | 63  | 422  | 360  | 60.28 | LOC_Os08g19980.1 | 97 | 581  | 1.00E-165 | NBS-LRR disease resistance protein |
| Unigene_226 | 972  | 58 | 319 | 627  | 309  | 57.61 | LOC_Os01g71106.2 | 94 | 557  | 1.00E-157 | NBS-LRR disease resistance protein |
| Unigene_227 | 682  | 27 | 432 | 1    | 432  | 44.44 | LOC_Os01g71106.2 | 94 | 1061 | 0         | NBS-LRR disease resistance protein |
| Unigene_228 | 541  | 20 | 29  | 541  | 513  | 49.12 | LOC_Os01g71106.2 | 92 | 755  | 0         | NBS-LRR disease resistance protein |
| Unigene_229 | 934  | 43 | 927 | 94   | 834  | 40.77 | LOC_Os01g71106.2 | 97 | 1398 | 0         | NBS-LRR disease resistance protein |
| Unigene_230 | 285  | 11 | 167 | 3    | 165  | 38.18 | LOC_Os01g71106.2 | 97 | 502  | 1.00E-141 | NBS-LRR disease resistance protein |
| Unigene_231 | 412  | 23 | 31  | 324  | 294  | 46.94 | LOC_Os10g25487.1 | 93 | 496  | 1.00E-139 | NBS-LRR disease resistance protein |
| Unigene_232 | 656  | 38 | 31  | 324  | 294  | 46.94 | LOC_Os10g25487.1 | 93 | 500  | 1.00E-140 | NBS-LRR disease resistance protein |
| Unigene_233 | 256  | 13 | 29  | 256  | 228  | 47.81 | LOC_Os10g25487.1 | 92 | 357  | 7.00E-98  | NBS-LRR disease resistance protein |

|             |      |     |      |      |      |       |                  |    |      |           |                                    |
|-------------|------|-----|------|------|------|-------|------------------|----|------|-----------|------------------------------------|
| Unigene_234 | 592  | 28  | 225  | 590  | 366  | 49.45 | LOC_Os10g25487.1 | 93 | 355  | 7.00E-97  | NBS-LRR disease resistance protein |
| Unigene_235 | 739  | 55  | 306  | 1    | 306  | 42.48 | LOC_Os10g25487.1 | 96 | 1235 | 0         | NBS-LRR disease resistance protein |
| Unigene_236 | 221  | 4   | 94   | 213  | 120  | 40    | LOC_Os10g25487.1 | 91 | 206  | 1.00E-52  | NBS-LRR disease resistance protein |
| Unigene_237 | 1124 | 76  | 1087 | 2    | 1086 | 41.71 | LOC_Os10g25487.1 | 95 | 1810 | 0         | NBS-LRR disease resistance protein |
| Unigene_238 | 370  | 11  | 182  | 370  | 189  | 58.73 | LOC_Os10g25487.1 | 95 | 567  | 1.00E-161 | NBS-LRR disease resistance protein |
| Unigene_239 | 327  | 13  | 9    | 326  | 318  | 46.23 | LOC_Os04g53000.1 | 86 | 105  | 6.00E-22  | NBS-LRR disease resistance protein |
| Unigene_240 | 1081 | 49  | 1080 | 1    | 1080 | 43.15 | LOC_Os11g29520.1 | 82 | 529  | 1.00E-149 | NBS-LRR disease resistance protein |
| Unigene_241 | 679  | 24  | 637  | 449  | 189  | 42.33 | LOC_Os04g53000.1 | 83 | 121  | 2.00E-26  | NBS-LRR disease resistance protein |
| Unigene_242 | 958  | 86  | 25   | 957  | 933  | 41.37 | LOC_Os06g49380.3 | 85 | 434  | 1.00E-120 | NBS-LRR disease resistance protein |
| Unigene_243 | 721  | 39  | 710  | 3    | 708  | 37.85 | LOC_Os06g49360.1 | 92 | 1011 | 0         | NBS-LRR disease resistance protein |
| Unigene_244 | 994  | 46  | 983  | 3    | 981  | 36.7  | LOC_Os06g49380.3 | 86 | 898  | 0         | NBS-LRR disease resistance protein |
| Unigene_245 | 516  | 17  | 20   | 514  | 495  | 64.85 | LOC_Os06g49390.1 | 85 | 307  | 1.00E-82  | NBS-LRR disease resistance protein |
| Unigene_246 | 207  | 5   | 70   | 207  | 138  | 56.52 | LOC_Os06g49390.1 | 93 | 230  | 9.00E-60  | NBS-LRR disease resistance protein |
| Unigene_247 | 267  | 6   | 30   | 266  | 237  | 62.03 | LOC_Os06g49390.1 | 84 | 83.8 | 2.00E-15  | NBS-LRR disease resistance protein |
| Unigene_248 | 1284 | 78  | 1181 | 3    | 1179 | 44.61 | LOC_Os04g52970.1 | 94 | 54   | 8.00E-06  | NBS-LRR disease resistance protein |
| Unigene_249 | 212  | 10  | 160  | 2    | 159  | 41.51 | LOC_Os06g17880.1 | 89 | 238  | 4.00E-62  | NBS-LRR disease resistance protein |
| Unigene_250 | 260  | 5   | 181  | 50   | 132  | 45.45 | LOC_Os06g17880.1 | 95 | 73.8 | 2.00E-12  | NBS-LRR disease resistance protein |
| Unigene_251 | 2693 | 142 | 1666 | 2691 | 1026 | 42.4  | LOC_Os06g17880.1 | 94 | 4159 | 0         | NBS-LRR disease resistance protein |
| Unigene_252 | 535  | 19  | 439  | 2    | 438  | 48.86 | LOC_Os09g34150.1 | 94 | 831  | 0         | NBS-LRR disease resistance protein |
| Unigene_253 | 522  | 24  | 512  | 3    | 510  | 56.67 | LOC_Os11g11810.1 | 80 | 141  | 2.00E-32  | NBS-LRR disease resistance protein |
| Unigene_254 | 283  | 13  |      |      |      |       | LOC_Os11g11810.1 | 81 | 131  | 9.00E-30  | NBS-LRR disease resistance protein |
| Unigene_255 | 1881 | 145 | 59   | 1879 | 1821 | 45.85 | LOC_Os11g11810.1 | 81 | 141  | 6.00E-32  | NBS-LRR disease resistance protein |
| Unigene_256 | 474  | 29  | 118  | 2    | 117  | 37.61 | LOC_Os11g11810.1 | 85 | 119  | 6.00E-26  | NBS-LRR disease resistance protein |
| Unigene_257 | 2312 | 102 | 31   | 2289 | 2259 | 44.05 | LOC_Os07g29820.1 | 93 | 3366 | 0         | NBS-LRR disease resistance protein |
| Unigene_258 | 806  | 57  | 3    | 449  | 447  | 43.18 | LOC_Os07g29820.1 | 92 | 916  | 0         | NBS-LRR disease resistance protein |

|             |      |     |      |      |      |       |                  |    |      |           |                                    |
|-------------|------|-----|------|------|------|-------|------------------|----|------|-----------|------------------------------------|
| Unigene_259 | 804  | 59  | 115  | 447  | 333  | 39.64 | LOC_Os07g29820.1 | 93 | 1160 | 0         | NBS-LRR disease resistance protein |
| Unigene_260 | 690  | 28  | 532  | 98   | 435  | 44.83 | LOC_Os06g49380.3 | 91 | 795  | 0         | NBS-LRR disease resistance protein |
| Unigene_261 | 2681 | 305 | 39   | 1544 | 1506 | 48.27 | LOC_Os06g49380.3 | 93 | 601  | 1.00E-170 | NBS-LRR disease resistance protein |
| Unigene_262 | 2203 | 247 | 39   | 1544 | 1506 | 48.27 | LOC_Os06g49380.3 | 93 | 601  | 1.00E-170 | NBS-LRR disease resistance protein |
| Unigene_263 | 2645 | 309 | 72   | 1508 | 1437 | 48.5  | LOC_Os06g49380.3 | 88 | 198  | 4.00E-49  | NBS-LRR disease resistance protein |
| Unigene_264 | 2167 | 251 | 72   | 1508 | 1437 | 48.5  | LOC_Os06g49390.1 | 87 | 180  | 8.00E-44  | NBS-LRR disease resistance protein |
| Unigene_265 | 324  | 7   | 94   | 324  | 231  | 47.62 | LOC_Os06g49380.3 | 89 | 349  | 2.00E-95  | NBS-LRR disease resistance protein |
| Unigene_266 | 277  | 7   | 229  | 62   | 168  | 43.45 | LOC_Os06g49360.1 | 91 | 287  | 6.00E-77  | NBS-LRR disease resistance protein |
| Unigene_267 | 1538 | 80  | 1478 | 705  | 774  | 37.86 | LOC_Os07g04900.1 | 94 | 1614 | 0         | NBS-LRR disease resistance protein |
| Unigene_268 | 2362 | 202 | 2118 | 1162 | 957  | 39.92 | LOC_Os07g04900.1 | 88 | 1211 | 0         | NBS-LRR disease resistance protein |
| Unigene_269 | 1284 | 103 | 1282 | 869  | 414  | 50.48 | LOC_Os07g04900.1 | 89 | 523  | 1.00E-147 | NBS-LRR disease resistance protein |
| Unigene_270 | 2598 | 234 | 249  | 578  | 330  | 55.15 | LOC_Os04g53496.1 | 87 | 533  | 1.00E-150 | NBS-LRR disease resistance protein |
| Unigene_271 | 2446 | 230 | 249  | 578  | 330  | 55.15 | LOC_Os04g53496.1 | 87 | 533  | 1.00E-150 | NBS-LRR disease resistance protein |
| Unigene_272 | 1829 | 137 | 249  | 578  | 330  | 55.15 | LOC_Os04g53496.1 | 87 | 533  | 1.00E-150 | NBS-LRR disease resistance protein |
| Unigene_273 | 1700 | 129 | 249  | 578  | 330  | 55.15 | LOC_Os04g53496.1 | 87 | 533  | 1.00E-150 | NBS-LRR disease resistance protein |
| Unigene_274 | 2469 | 226 | 249  | 578  | 330  | 55.15 | LOC_Os04g53496.1 | 87 | 533  | 1.00E-150 | NBS-LRR disease resistance protein |
| Unigene_275 | 1677 | 133 | 249  | 578  | 330  | 55.15 | LOC_Os04g53496.1 | 87 | 533  | 1.00E-150 | NBS-LRR disease resistance protein |
| Unigene_276 | 1193 | 345 | 919  | 653  | 267  | 51.69 | LOC_Os06g17920.1 | 89 | 270  | 7.00E-71  | NBS-LRR disease resistance protein |
| Unigene_277 | 2263 | 511 | 885  | 616  | 270  | 40.74 | LOC_Os06g17920.1 | 89 | 270  | 1.00E-70  | NBS-LRR disease resistance protein |
| Unigene_278 | 1306 | 376 | 1032 | 616  | 417  | 46.52 | LOC_Os06g17920.1 | 89 | 270  | 7.00E-71  | NBS-LRR disease resistance protein |
| Unigene_279 | 1403 | 411 | 885  | 616  | 270  | 40.74 | LOC_Os06g17920.1 | 89 | 270  | 8.00E-71  | NBS-LRR disease resistance protein |
| Unigene_280 | 1456 | 423 | 938  | 570  | 369  | 42.82 | LOC_Os06g17920.1 | 89 | 270  | 8.00E-71  | NBS-LRR disease resistance protein |
| Unigene_281 | 2316 | 523 | 938  | 570  | 369  | 42.82 | LOC_Os06g17920.1 | 89 | 270  | 1.00E-70  | NBS-LRR disease resistance protein |
| Unigene_282 | 1246 | 357 | 972  | 706  | 267  | 51.69 | LOC_Os06g17920.1 | 89 | 270  | 7.00E-71  | NBS-LRR disease resistance protein |
| Unigene_283 | 2663 | 281 | 120  | 2342 | 2223 | 40.71 | LOC_Os11g10760.1 | 77 | 69.9 | 3.00E-10  | NBS-LRR disease resistance protein |

|             |      |      |      |      |      |       |                  |    |      |           |                                    |
|-------------|------|------|------|------|------|-------|------------------|----|------|-----------|------------------------------------|
| Unigene_284 | 2211 | 111  | 1057 | 2211 | 1155 | 39.48 | LOC_Os04g52970.1 | 96 | 1086 | 0         | NBS-LRR disease resistance protein |
| Unigene_285 | 513  | 14   | 217  | 513  | 297  | 40.74 | LOC_Os02g02670.1 | 87 | 492  | 1.00E-138 | NBS-LRR disease resistance protein |
| Unigene_286 | 265  | 10   | 241  | 2    | 240  | 42.92 | LOC_Os04g52970.1 | 91 | 212  | 3.00E-54  | NBS-LRR disease resistance protein |
| Unigene_287 | 2224 | 115  | 56   | 2224 | 2169 | 40.71 | LOC_Os04g52970.1 | 96 | 1086 | 0         | NBS-LRR disease resistance protein |
| Unigene_288 | 1266 | 65   | 112  | 1266 | 1155 | 39.22 | LOC_Os11g29520.1 | 86 | 543  | 1.00E-153 | NBS-LRR disease resistance protein |
| Unigene_289 | 3672 | 568  | 762  | 3671 | 2910 | 45.26 | LOC_Os11g11810.1 | 84 | 303  | 1.00E-80  | NBS-LRR disease resistance protein |
| Unigene_290 | 3536 | 546  | 762  | 2966 | 2205 | 45.26 | LOC_Os11g11810.1 | 84 | 303  | 1.00E-80  | NBS-LRR disease resistance protein |
| Unigene_291 | 491  | 22   | 455  | 3    | 453  | 49.89 | LOC_Os12g09240.1 | 95 | 79.8 | 5.00E-14  | NBS-LRR disease resistance protein |
| Unigene_292 | 3203 | 695  | 2895 | 214  | 2682 | 41.01 | LOC_Os10g10360.2 | 96 | 5233 | 0         | NBS-LRR disease resistance protein |
| Unigene_293 | 3753 | 819  | 3445 | 764  | 2682 | 41.01 | LOC_Os10g10360.1 | 96 | 5323 | 0         | NBS-LRR disease resistance protein |
| Unigene_294 | 3058 | 252  | 1058 | 3058 | 2001 | 44.68 | LOC_Os11g45180.1 | 90 | 3655 | 0         | NBS-LRR disease resistance protein |
| Unigene_295 | 2441 | 195  | 1059 | 2441 | 1383 | 41.58 | LOC_Os11g45180.1 | 91 | 3108 | 0         | NBS-LRR disease resistance protein |
| Unigene_296 | 1552 | 62   | 211  | 1551 | 1341 | 39.3  | LOC_Os08g15880.1 | 79 | 188  | 2.00E-46  | NBS-LRR disease resistance protein |
| Unigene_297 | 2440 | 198  | 1058 | 2440 | 1383 | 41.58 | LOC_Os11g45180.1 | 91 | 3100 | 0         | NBS-LRR disease resistance protein |
| Unigene_298 | 3575 | 277  | 1059 | 3176 | 2118 | 45.33 | LOC_Os11g45180.1 | 90 | 3683 | 0         | NBS-LRR disease resistance protein |
| Unigene_299 | 3911 | 2060 | 2666 | 1092 | 1575 | 42.03 | LOC_Os06g05359.1 | 93 | 3499 | 0         | NBS-LRR disease resistance protein |
| Unigene_300 | 4745 | 2932 | 3500 | 1926 | 1575 | 42.03 | LOC_Os06g05359.1 | 93 | 3499 | 0         | NBS-LRR disease resistance protein |
| Unigene_301 | 641  | 64   | 553  | 287  | 267  | 58.05 | LOC_Os11g13940.1 | 85 | 63.9 | 4.00E-09  | NBS-LRR disease resistance protein |
| Unigene_302 | 3799 | 364  | 2429 | 174  | 2256 | 41.89 | LOC_Os11g13940.1 | 92 | 4101 | 0         | NBS-LRR disease resistance protein |
| Unigene_303 | 512  | 41   | 479  | 93   | 387  | 57.11 | LOC_Os11g39160.1 | 97 | 432  | 1.00E-120 | NBS-LRR disease resistance protein |
| Unigene_304 | 1370 | 121  | 209  | 1120 | 912  | 55.48 | LOC_Os11g39160.1 | 93 | 965  | 0         | NBS-LRR disease resistance protein |
| Unigene_305 | 1281 | 118  | 209  | 796  | 588  | 59.86 | LOC_Os11g39160.1 | 97 | 464  | 1.00E-129 | NBS-LRR disease resistance protein |
| Unigene_306 | 1636 | 524  | 313  | 1635 | 1323 | 41.8  | LOC_Os06g17970.1 | 92 | 2187 | 0         | NBS-LRR disease resistance protein |
| Unigene_307 | 240  | 9    |      |      |      |       | LOC_Os06g17970.1 | 88 | 95.6 | 4.00E-19  | NBS-LRR disease resistance protein |
| Unigene_308 | 1451 | 490  | 89   | 1450 | 1362 | 41.85 | LOC_Os06g17970.1 | 90 | 1707 | 0         | NBS-LRR disease resistance protein |

|             |      |      |      |      |      |       |                  |     |      |           |                                    |
|-------------|------|------|------|------|------|-------|------------------|-----|------|-----------|------------------------------------|
| Unigene_309 | 3220 | 1259 | 89   | 1663 | 1575 | 43.49 | LOC_Os06g17970.1 | 90  | 1897 | 0         | NBS-LRR disease resistance protein |
| Unigene_310 | 1724 | 565  | 627  | 1022 | 396  | 36.87 | LOC_Os06g17950.1 | 87  | 432  | 1.00E-119 | NBS-LRR disease resistance protein |
| Unigene_311 | 1171 | 522  | 408  | 683  | 276  | 45.65 | LOC_Os06g17950.1 | 87  | 432  | 1.00E-120 | NBS-LRR disease resistance protein |
| Unigene_312 | 2667 | 1216 | 89   | 1663 | 1575 | 43.49 | LOC_Os06g17970.1 | 90  | 1897 | 0         | NBS-LRR disease resistance protein |
| Unigene_313 | 2316 | 277  | 1978 | 1439 | 540  | 51.85 | LOC_Os06g17920.1 | 96  | 200  | 1.00E-49  | NBS-LRR disease resistance protein |
| Unigene_314 | 846  | 74   | 419  | 246  | 174  | 60.92 | LOC_Os06g17920.1 | 96  | 200  | 4.00E-50  | NBS-LRR disease resistance protein |
| Unigene_315 | 3280 | 1210 | 319  | 2910 | 2592 | 47.3  | LOC_Os08g10440.1 | 87  | 2617 | 0         | NBS-LRR disease resistance protein |
| Unigene_316 | 2669 | 1134 | 319  | 2667 | 2349 | 46.53 | LOC_Os08g10440.1 | 87  | 2395 | 0         | NBS-LRR disease resistance protein |
| Unigene_317 | 2465 | 1069 | 115  | 2463 | 2349 | 46.53 | LOC_Os08g10440.1 | 87  | 2395 | 0         | NBS-LRR disease resistance protein |
| Unigene_318 | 209  | 19   |      |      |      |       | LOC_Os08g10430.1 | 96  | 129  | 2.00E-29  | NBS-LRR disease resistance protein |
| Unigene_319 | 3465 | 1299 | 504  | 3095 | 2592 | 47.3  | LOC_Os08g10440.1 | 87  | 2617 | 0         | NBS-LRR disease resistance protein |
| Unigene_320 | 2892 | 1126 | 115  | 2706 | 2592 | 47.3  | LOC_Os08g10440.1 | 87  | 2617 | 0         | NBS-LRR disease resistance protein |
| Unigene_321 | 3076 | 1145 | 115  | 2706 | 2592 | 47.3  | LOC_Os08g10440.1 | 87  | 2617 | 0         | NBS-LRR disease resistance protein |
| Unigene_322 | 208  | 16   | 24   | 176  | 153  | 60.13 | LOC_Os08g10440.1 | 88  | 170  | 7.00E-42  | NBS-LRR disease resistance protein |
| Unigene_323 | 2867 | 1271 | 517  | 2865 | 2349 | 46.53 | LOC_Os08g10440.1 | 87  | 2395 | 0         | NBS-LRR disease resistance protein |
| Unigene_324 | 3096 | 1191 | 319  | 2910 | 2592 | 47.3  | LOC_Os08g10440.1 | 87  | 2617 | 0         | NBS-LRR disease resistance protein |
| Unigene_325 | 3281 | 1280 | 504  | 3095 | 2592 | 47.3  | LOC_Os08g10440.1 | 87  | 2617 | 0         | NBS-LRR disease resistance protein |
| Unigene_326 | 3294 | 1328 | 517  | 3108 | 2592 | 47.3  | LOC_Os08g10440.1 | 87  | 2617 | 0         | NBS-LRR disease resistance protein |
| Unigene_327 | 2854 | 1223 | 504  | 2852 | 2349 | 46.53 | LOC_Os08g10440.1 | 87  | 2395 | 0         | NBS-LRR disease resistance protein |
| Unigene_328 | 3478 | 1356 | 517  | 3108 | 2592 | 47.3  | LOC_Os08g10440.1 | 87  | 2617 | 0         | NBS-LRR disease resistance protein |
| Unigene_329 | 377  | 12   | 196  | 2    | 195  | 35.9  | LOC_Os11g44960.1 | 100 | 54   | 2.00E-06  | NBS-LRR disease resistance protein |
| Unigene_330 | 234  | 7    | 174  | 1    | 174  | 35.06 | LOC_Os06g49380.3 | 97  | 416  | 1.00E-116 | NBS-LRR disease resistance protein |
| Unigene_331 | 203  | 6    |      |      |      |       | LOC_Os10g25487.1 | 88  | 85.7 | 3.00E-16  | NBS-LRR disease resistance protein |
| Unigene_332 | 213  | 7    |      |      |      |       | LOC_Os08g19980.1 | 100 | 422  | 1.00E-117 | NBS-LRR disease resistance protein |
| Unigene_333 | 204  | 4    | 60   | 203  | 144  | 38.19 | LOC_Os08g19980.1 | 98  | 369  | 1.00E-101 | NBS-LRR disease resistance protein |

|             |      |     |      |      |      |       |                  |    |      |           |                                                     |
|-------------|------|-----|------|------|------|-------|------------------|----|------|-----------|-----------------------------------------------------|
| Unigene_334 | 426  | 10  | 50   | 424  | 375  | 41.07 | LOC_Os08g15880.1 | 83 | 91.7 | 1.00E-17  | NBS-LRR disease resistance protein                  |
| Unigene_335 | 236  | 6   | 18   | 236  | 219  | 50.23 | LOC_Os04g53060.1 | 87 | 71.9 | 6.00E-12  | NBS-LRR disease resistance protein                  |
| Unigene_336 | 1320 | 44  | 1093 | 143  | 951  | 48.16 | LOC_Os11g45050.1 | 83 | 125  | 3.00E-27  | NBS-LRR disease resistance protein                  |
| Unigene_337 | 203  | 4   |      |      |      |       | LOC_Os02g38386.1 | 88 | 60   | 2.00E-08  | NBS-LRR disease resistance protein                  |
| Unigene_338 | 768  | 21  | 48   | 446  | 399  | 39.85 | LOC_Os06g49390.1 | 83 | 533  | 1.00E-150 | NBS-LRR disease resistance protein                  |
| Unigene_339 | 332  | 11  | 149  | 331  | 183  | 43.72 | LOC_Os06g17910.1 | 94 | 248  | 6.00E-65  | NBS-LRR disease resistance protein                  |
| Unigene_340 | 212  | 6   |      |      |      |       | LOC_Os12g29690.1 | 98 | 389  | 1.00E-107 | NBS-LRR disease resistance protein                  |
| Unigene_341 | 316  | 8   | 76   | 315  | 240  | 68.75 | LOC_Os09g34150.1 | 93 | 313  | 1.00E-84  | NBS-LRR disease resistance protein                  |
| Unigene_342 | 298  | 7   | 278  | 3    | 276  | 50.72 | LOC_Os08g16460.1 | 94 | 127  | 1.00E-28  | NBS-LRR disease resistance protein                  |
| Unigene_343 | 271  | 8   | 56   | 271  | 216  | 40.74 | LOC_Os06g49380.3 | 97 | 466  | 1.00E-130 | NBS-LRR disease resistance protein                  |
| Unigene_344 | 337  | 9   | 32   | 337  | 306  | 39.54 | LOC_Os11g15670.1 | 87 | 321  | 5.00E-87  | NBS-LRR disease resistance protein                  |
| Unigene_345 | 242  | 5   | 167  | 3    | 165  | 46.67 | LOC_Os11g15670.1 | 89 | 264  | 8.00E-70  | NBS-LRR disease resistance protein                  |
| Unigene_346 | 320  | 9   |      |      |      |       | LOC_Os12g29710.1 | 88 | 111  | 9.00E-24  | NBS-LRR disease resistance protein                  |
| Unigene_347 | 244  | 5   | 147  | 1    | 147  | 63.95 | LOC_Os07g04900.1 | 91 | 317  | 6.00E-86  | NBS-LRR disease resistance protein                  |
| Unigene_348 | 266  | 8   | 49   | 264  | 216  | 51.85 | LOC_Os02g02640.1 | 83 | 121  | 8.00E-27  | NBS-LRR disease resistance protein                  |
| Unigene_349 | 281  | 6   | 23   | 280  | 258  | 45.35 | LOC_Os06g49360.1 | 92 | 309  | 2.00E-83  | NBS-LRR disease resistance protein                  |
| Unigene_350 | 297  | 7   | 13   | 297  | 285  | 42.46 | LOC_Os12g29690.1 | 89 | 361  | 5.00E-99  | NBS-LRR disease resistance protein                  |
| Unigene_351 | 229  | 5   |      |      |      |       | LOC_Os04g53160.1 | 87 | 212  | 2.00E-54  | NBS-LRR disease resistance protein                  |
| Unigene_352 | 1643 | 81  | 1518 | 601  | 918  | 42.16 | LOC_Os05g50780.1 | 89 | 817  | 0         | NBS-LRR resistance-like protein B11                 |
| Unigene_353 | 3696 | 789 | 3638 | 1998 | 1641 | 48.14 | LOC_Os09g20020.1 | 91 | 4038 | 0         | NBS-LRR resistance-like protein B8                  |
| Unigene_354 | 3947 | 862 | 3889 | 2249 | 1641 | 48.14 | LOC_Os09g20020.1 | 91 | 4121 | 0         | NBS-LRR resistance-like protein B8                  |
| Unigene_355 | 3975 | 856 | 3917 | 2277 | 1641 | 48.14 | LOC_Os09g20020.1 | 91 | 4121 | 0         | NBS-LRR resistance-like protein B8                  |
| Unigene_356 | 281  | 6   | 134  | 280  | 147  | 48.98 | LOC_Os03g37720.1 | 97 | 480  | 1.00E-135 | NBS-LRR type disease resistance protein<br>Rps1-k-1 |
| Unigene_357 | 405  | 11  | 149  | 36   | 114  | 39.47 | LOC_Os03g37720.1 | 95 | 652  | 0         | NBS-LRR type disease resistance protein             |

|             |     |    |     |     |     |       |                  |    |      |           |                                         |
|-------------|-----|----|-----|-----|-----|-------|------------------|----|------|-----------|-----------------------------------------|
|             |     |    |     |     |     |       |                  |    |      |           | Rps1-k-1                                |
| Unigene_358 | 239 | 6  | 109 | 2   | 108 | 69.44 | LOC_Os03g37720.1 | 97 | 135  | 5.00E-31  | NBS-LRR type disease resistance protein |
|             |     |    |     |     |     |       |                  |    |      |           | Rps1-k-1                                |
| Unigene_359 | 225 | 7  | 105 | 1   | 105 | 76.19 | LOC_Os03g37720.1 | 89 | 268  | 5.00E-71  | NBS-LRR type disease resistance protein |
|             |     |    |     |     |     |       |                  |    |      |           | Rps1-k-1                                |
| Unigene_360 | 277 | 5  |     |     |     |       | LOC_Os12g10180.1 | 90 | 351  | 5.00E-96  | NBS-LRR type disease resistance protein |
|             |     |    |     |     |     |       |                  |    |      |           | Rps1-k-2                                |
| Unigene_361 | 280 | 7  | 43  | 279 | 237 | 43.88 | LOC_Os12g10180.1 | 94 | 424  | 1.00E-118 | NBS-LRR type disease resistance protein |
|             |     |    |     |     |     |       |                  |    |      |           | Rps1-k-2                                |
| Unigene_362 | 352 | 10 |     |     |     |       | LOC_Os12g10180.1 | 94 | 547  | 1.00E-155 | NBS-LRR type disease resistance protein |
|             |     |    |     |     |     |       |                  |    |      |           | Rps1-k-2                                |
| Unigene_363 | 402 | 11 | 172 | 402 | 231 | 40.69 | LOC_Os12g10180.1 | 95 | 387  | 1.00E-106 | NBS-LRR type disease resistance protein |
|             |     |    |     |     |     |       |                  |    |      |           | Rps1-k-2                                |
| Unigene_364 | 372 | 9  | 266 | 3   | 264 | 64.77 | LOC_Os11g11790.1 | 91 | 480  | 1.00E-134 | NBS-LRR type disease resistance protein |
| Unigene_365 | 703 | 21 | 280 | 702 | 423 | 43.74 | LOC_Os11g30210.1 | 92 | 581  | 1.00E-165 | NBS-LRR type disease resistance protein |
| Unigene_366 | 413 | 22 | 350 | 3   | 348 | 41.67 | LOC_Os11g30210.1 | 92 | 299  | 2.00E-80  | NBS-LRR type disease resistance protein |
| Unigene_367 | 834 | 43 | 52  | 834 | 783 | 39.21 | LOC_Os11g30210.1 | 90 | 541  | 1.00E-153 | NBS-LRR type disease resistance protein |
| Unigene_368 | 788 | 49 | 722 | 3   | 720 | 56.67 | LOC_Os11g30210.1 | 89 | 888  | 0         | NBS-LRR type disease resistance protein |
| Unigene_369 | 266 | 6  | 10  | 264 | 255 | 35.29 | LOC_Os11g30210.1 | 94 | 398  | 1.00E-110 | NBS-LRR type disease resistance protein |
| Unigene_370 | 261 | 5  | 1   | 261 | 261 | 45.98 | LOC_Os11g43320.1 | 99 | 502  | 1.00E-141 | NBS-LRR type disease resistance protein |
| Unigene_371 | 239 | 11 | 29  | 172 | 144 | 51.39 | LOC_Os04g39460.1 | 96 | 410  | 1.00E-114 | NBS-LRR type disease resistance protein |
| Unigene_372 | 228 | 13 | 31  | 228 | 198 | 52.53 | LOC_Os04g39460.1 | 95 | 359  | 2.00E-98  | NBS-LRR type disease resistance protein |
| Unigene_373 | 658 | 24 | 651 | 1   | 651 | 55.3  | LOC_Os04g39460.1 | 94 | 1011 | 0         | NBS-LRR type disease resistance protein |
| Unigene_374 | 486 | 13 | 124 | 486 | 363 | 53.17 | LOC_Os04g39460.1 | 95 | 696  | 0         | NBS-LRR type disease resistance protein |
| Unigene_375 | 508 | 24 | 26  | 232 | 207 | 46.38 | LOC_Os04g39460.1 | 97 | 410  | 1.00E-113 | NBS-LRR type disease resistance protein |



|             |      |     |      |      |      |       |                  |     |      |           |                                         |
|-------------|------|-----|------|------|------|-------|------------------|-----|------|-----------|-----------------------------------------|
| Unigene_376 | 340  | 7   | 251  | 3    | 249  | 46.18 | LOC_Os07g40810.1 | 95  | 547  | 1.00E-155 | NBS-LRR type disease resistance protein |
| Unigene_377 | 224  | 7   | 208  | 77   | 132  | 46.97 | LOC_Os06g06380.1 | 98  | 379  | 1.00E-104 | NBS-LRR type disease resistance protein |
| Unigene_378 | 479  | 28  | 148  | 438  | 291  | 48.45 | LOC_Os11g42700.1 | 92  | 117  | 2.00E-25  | NBS-LRR type disease resistance protein |
| Unigene_379 | 2967 | 236 | 2868 | 1414 | 1455 | 46.8  | LOC_Os11g38580.1 | 91  | 2355 | 0         | NBS-LRR type disease resistance protein |
| Unigene_380 | 2874 | 225 | 2775 | 1321 | 1455 | 46.8  | LOC_Os11g38580.1 | 90  | 2030 | 0         | NBS-LRR type disease resistance protein |
| Unigene_381 | 2425 | 224 | 2168 | 129  | 2040 | 42.79 | LOC_Os11g11790.1 | 94  | 3768 | 0         | NBS-LRR type disease resistance protein |
| Unigene_382 | 322  | 10  | 190  | 2    | 189  | 39.15 | LOC_Os11g43320.1 | 100 | 634  | 0         | NBS-LRR type disease resistance protein |
| Unigene_383 | 387  | 10  | 194  | 3    | 192  | 43.75 | LOC_Os11g43320.1 | 100 | 767  | 0         | NBS-LRR type disease resistance protein |
| Unigene_384 | 4249 | 713 | 63   | 1649 | 1587 | 45.37 | LOC_Os11g29990.1 | 94  | 4601 | 0         | NBS-LRR type disease resistance protein |
| Unigene_385 | 3958 | 662 | 63   | 1649 | 1587 | 45.37 | LOC_Os11g29990.1 | 94  | 4601 | 0         | NBS-LRR type disease resistance protein |
| Unigene_386 | 3546 | 806 | 3043 | 311  | 2733 | 43.8  | LOC_Os11g12050.1 | 92  | 3362 | 0         | NBS-LRR type disease resistance protein |
| Unigene_387 | 3462 | 805 | 3043 | 311  | 2733 | 43.8  | LOC_Os11g12050.1 | 92  | 3362 | 0         | NBS-LRR type disease resistance protein |
| Unigene_388 | 3332 | 775 | 3070 | 311  | 2760 | 43.77 | LOC_Os11g12050.1 | 92  | 3362 | 0         | NBS-LRR type disease resistance protein |
| Unigene_389 | 3392 | 531 | 17   | 3073 | 3057 | 48.61 | LOC_Os11g45930.1 | 93  | 2139 | 0         | NBS-LRR type disease resistance protein |
| Unigene_390 | 1769 | 195 | 17   | 1768 | 1752 | 52.17 | LOC_Os11g45930.1 | 94  | 1084 | 0         | NBS-LRR type disease resistance protein |
| Unigene_391 | 377  | 8   | 19   | 375  | 357  | 63.03 | LOC_Os04g39460.1 | 93  | 410  | 1.00E-114 | NBS-LRR type disease resistance protein |
| Unigene_392 | 365  | 11  | 194  | 3    | 192  | 43.23 | LOC_Os11g30210.1 | 85  | 71.9 | 9.00E-12  | NBS-LRR type disease resistance protein |
| Unigene_393 | 221  | 4   | 200  | 3    | 198  | 41.41 | LOC_Os11g38580.1 | 87  | 220  | 9.00E-57  | NBS-LRR type disease resistance protein |
| Unigene_394 | 213  | 5   | 41   | 211  | 171  | 47.95 | LOC_Os11g12050.1 | 87  | 206  | 1.00E-52  | NBS-LRR type disease resistance protein |
| Unigene_395 | 335  | 11  | 107  | 334  | 228  | 49.56 | LOC_Os06g06380.1 | 96  | 571  | 1.00E-162 | NBS-LRR type disease resistance protein |
| Unigene_396 | 231  | 27  | 228  | 1    | 228  | 42.54 | LOC_Os11g12260.1 | 89  | 258  | 4.00E-68  | Non-TIR-NBS-LRR type resistance protein |
| Unigene_397 | 1317 | 142 | 135  | 344  | 210  | 42.38 | LOC_Os03g63150.2 | 89  | 315  | 1.00E-84  | Powdery mildew resistance protein PM3b  |
| Unigene_398 | 1226 | 150 | 135  | 344  | 210  | 42.38 | LOC_Os03g63150.1 | 90  | 230  | 6.00E-59  | Powdery mildew resistance protein PM3b  |
| Unigene_399 | 1141 | 37  | 167  | 481  | 315  | 46.98 | LOC_Os10g04060.1 | 92  | 842  | 0         | Powdery mildew resistance protein PM3b  |
| Unigene_400 | 1179 | 41  | 167  | 481  | 315  | 46.98 | LOC_Os10g04060.1 | 92  | 842  | 0         | Powdery mildew resistance protein PM3b  |

|             |      |      |      |      |      |       |                  |    |      |           |                                         |
|-------------|------|------|------|------|------|-------|------------------|----|------|-----------|-----------------------------------------|
| Unigene_401 | 317  | 7    | 125  | 316  | 192  | 36.98 | LOC_Os10g04060.1 | 93 | 468  | 1.00E-131 | Powdery mildew resistance protein PM3b  |
| Unigene_402 | 280  | 9    | 196  | 2    | 195  | 45.13 | LOC_Os10g04060.1 | 91 | 101  | 8.00E-21  | Powdery mildew resistance protein PM3b  |
| Unigene_403 | 235  | 7    | 51   | 218  | 168  | 42.86 | LOC_Os01g06920.1 | 94 | 355  | 3.00E-97  | Resistance protein slve1 precursor      |
| Unigene_404 | 205  | 4    | 54   | 185  | 132  | 37.12 | LOC_Os01g06920.1 | 91 | 250  | 1.00E-65  | Resistance protein slve1 precursor      |
| Unigene_405 | 924  | 50   | 653  | 3    | 651  | 42.4  | LOC_Os01g06920.1 | 86 | 864  | 0         | Resistance protein slve1 precursor      |
| Unigene_406 | 600  | 19   | 121  | 600  | 480  | 37.71 | LOC_Os01g06920.1 | 88 | 494  | 1.00E-138 | Resistance protein slve1 precursor      |
| Unigene_407 | 932  | 135  | 153  | 701  | 549  | 57.74 | LOC_Os11g11920.1 | 83 | 291  | 1.00E-77  | Resistance protein                      |
| Unigene_408 | 741  | 102  | 153  | 731  | 579  | 60.62 | LOC_Os11g11920.1 | 82 | 252  | 9.00E-66  | Resistance protein                      |
| Unigene_409 | 675  | 41   | 611  | 3    | 609  | 58.13 | LOC_Os08g42700.1 | 93 | 924  | 0         | Resistance protein                      |
| Unigene_410 | 1375 | 166  | 1315 | 206  | 1110 | 50.72 | LOC_Os08g42670.1 | 90 | 1332 | 0         | Resistance protein                      |
| Unigene_411 | 314  | 17   | 309  | 43   | 267  | 52.06 | LOC_Os02g17304.1 | 90 | 309  | 2.00E-83  | Resistance protein                      |
| Unigene_412 | 2713 | 284  | 2550 | 1    | 2550 | 45.14 | LOC_Os02g17304.1 | 90 | 3112 | 0         | Resistance protein                      |
| Unigene_413 | 2350 | 249  | 2187 | 1    | 2187 | 44.26 | LOC_Os02g17304.1 | 90 | 2642 | 0         | Resistance protein                      |
| Unigene_414 | 368  | 13   | 198  | 88   | 111  | 38.74 | LOC_Os02g17304.1 | 88 | 105  | 7.00E-22  | Resistance protein                      |
| Unigene_415 | 3586 | 1679 | 99   | 3122 | 3024 | 45.83 | LOC_Os11g11920.1 | 96 | 5031 | 0         | Resistance protein                      |
| Unigene_416 | 3513 | 1644 | 644  | 3049 | 2406 | 43.89 | LOC_Os11g11920.1 | 96 | 4155 | 0         | Resistance protein                      |
| Unigene_417 | 3645 | 1734 | 99   | 3284 | 3186 | 46.74 | LOC_Os11g11920.1 | 96 | 5031 | 0         | Resistance protein                      |
| Unigene_418 | 3572 | 1699 | 644  | 3211 | 2568 | 45.13 | LOC_Os11g11920.1 | 96 | 4155 | 0         | Resistance protein                      |
| Unigene_419 | 438  | 17   | 407  | 3    | 405  | 47.41 | LOC_Os08g42700.1 | 94 | 615  | 1.00E-175 | Resistance protein                      |
| Unigene_420 | 301  | 9    | 198  | 1    | 198  | 41.92 | LOC_Os02g35210.1 | 98 | 553  | 1.00E-157 | Resistance protein                      |
| Unigene_421 | 416  | 9    | 36   | 272  | 237  | 45.99 | LOC_Os09g34160.1 | 94 | 357  | 1.00E-97  | Resistance protein                      |
| Unigene_422 | 323  | 9    | 321  | 10   | 312  | 46.47 | LOC_Os02g35210.1 | 95 | 525  | 1.00E-148 | Resistance protein                      |
| Unigene_423 | 372  | 14   | 229  | 372  | 144  | 37.5  | LOC_Os01g02810.1 | 93 | 272  | 5.00E-72  | Resistance-related receptor-like kinase |
| Unigene_424 | 300  | 8    | 5    | 298  | 294  | 51.02 | LOC_Os01g02840.1 | 94 | 61.9 | 7.00E-09  | Resistance-related receptor-like kinase |
| Unigene_425 | 357  | 10   | 302  | 24   | 279  | 46.59 | LOC_Os01g02810.1 | 81 | 151  | 1.00E-35  | Resistance-related receptor-like kinase |

|             |      |     |     |      |      |       |                  |    |      |           |                                         |
|-------------|------|-----|-----|------|------|-------|------------------|----|------|-----------|-----------------------------------------|
| Unigene_426 | 220  | 14  |     |      |      |       | LOC_Os01g02840.1 | 91 | 119  | 3.00E-26  | Resistance-related receptor-like kinase |
| Unigene_427 | 277  | 21  | 73  | 276  | 204  | 47.06 | LOC_Os01g02770.1 | 96 | 478  | 1.00E-134 | Resistance-related receptor-like kinase |
| Unigene_428 | 339  | 23  | 61  | 339  | 279  | 42.65 | LOC_Os01g02810.1 | 97 | 593  | 1.00E-168 | Resistance-related receptor-like kinase |
| Unigene_429 | 868  | 68  | 597 | 1    | 597  | 43.72 | LOC_Os01g02810.1 | 87 | 841  | 0         | Resistance-related receptor-like kinase |
| Unigene_430 | 1015 | 528 | 354 | 599  | 246  | 47.15 | LOC_Os01g02360.1 | 95 | 65.9 | 2.00E-09  | Resistance-related receptor-like kinase |
| Unigene_431 | 1028 | 521 | 354 | 701  | 348  | 50    | LOC_Os01g02360.1 | 95 | 65.9 | 2.00E-09  | Resistance-related receptor-like kinase |
| Unigene_432 | 1090 | 532 | 354 | 701  | 348  | 50    | LOC_Os01g02360.1 | 95 | 65.9 | 2.00E-09  | Resistance-related receptor-like kinase |
| Unigene_433 | 1077 | 539 | 354 | 599  | 246  | 47.15 | LOC_Os01g02360.1 | 95 | 65.9 | 2.00E-09  | Resistance-related receptor-like kinase |
| Unigene_434 | 512  | 230 | 268 | 420  | 153  | 57.52 | LOC_Os01g02360.1 | 95 | 65.9 | 8.00E-10  | Resistance-related receptor-like kinase |
| Unigene_435 | 450  | 219 | 137 | 358  | 222  | 53.15 | LOC_Os01g02360.1 | 95 | 65.9 | 7.00E-10  | Resistance-related receptor-like kinase |
| Unigene_436 | 510  | 17  | 139 | 510  | 372  | 47.85 | LOC_Os12g36730.1 | 81 | 240  | 2.00E-62  | Stripe rust resistance protein Yr10     |
| Unigene_437 | 602  | 38  | 466 | 107  | 360  | 66.67 | LOC_Os10g04342.1 | 91 | 165  | 1.00E-39  | Stripe rust resistance protein Yr10     |
| Unigene_438 | 1557 | 96  | 191 | 1216 | 1026 | 50.78 | LOC_Os11g37880.1 | 89 | 87.7 | 7.00E-16  | Stripe rust resistance protein Yr10     |
| Unigene_439 | 1654 | 95  | 191 | 1216 | 1026 | 50.78 | LOC_Os11g37880.1 | 89 | 87.7 | 7.00E-16  | Stripe rust resistance protein Yr10     |
| Unigene_440 | 221  | 5   | 14  | 220  | 207  | 38.16 | LOC_Os10g04342.1 | 88 | 226  | 2.00E-58  | Stripe rust resistance protein Yr10     |
| Unigene_441 | 425  | 14  | 29  | 424  | 396  | 51.52 | LOC_Os11g34920.1 | 97 | 771  | 0         | Stripe rust resistance protein Yr10     |
| Unigene_442 | 229  | 6   | 213 | 1    | 213  | 56.34 | LOC_Os11g34920.1 | 96 | 192  | 2.00E-48  | Stripe rust resistance protein Yr10     |
| Unigene_443 | 249  | 5   | 248 | 3    | 246  | 40.24 | LOC_Os11g34920.1 | 97 | 454  | 1.00E-127 | Stripe rust resistance protein Yr10     |
| Unigene_444 | 213  | 6   |     |      |      |       | LOC_Os12g36730.1 | 95 | 137  | 1.00E-31  | Stripe rust resistance protein Yr10     |
| Unigene_445 | 1067 | 55  | 891 | 1    | 891  | 41.41 | LOC_Os12g17490.1 | 91 | 63.9 | 7.00E-09  | Stripe rust resistance protein Yr10     |
| Unigene_446 | 1779 | 116 | 958 | 1779 | 822  | 37.71 | LOC_Os11g37880.1 | 80 | 593  | 1.00E-168 | Stripe rust resistance protein Yr10     |
| Unigene_447 | 1154 | 77  | 60  | 974  | 915  | 47.54 | LOC_Os01g23380.1 | 95 | 1810 | 0         | Stripe rust resistance protein Yr10     |
| Unigene_448 | 798  | 49  | 686 | 3    | 684  | 42.69 | LOC_Os01g23380.1 | 95 | 1273 | 0         | Stripe rust resistance protein Yr10     |
| Unigene_449 | 202  | 4   | 119 | 15   | 105  | 61.9  | LOC_Os11g37740.1 | 88 | 85.7 | 3.00E-16  | Stripe rust resistance protein Yr10     |
| Unigene_450 | 516  | 35  | 44  | 514  | 471  | 42.46 | LOC_Os12g17490.1 | 98 | 862  | 0         | Stripe rust resistance protein Yr10     |

|             |      |     |      |      |      |       |                  |    |      |           |                                                     |
|-------------|------|-----|------|------|------|-------|------------------|----|------|-----------|-----------------------------------------------------|
| Unigene_451 | 326  | 12  | 10   | 324  | 315  | 47.62 | LOC_Os12g17490.1 | 96 | 543  | 1.00E-154 | Stripe rust resistance protein Yr10                 |
| Unigene_452 | 1521 | 113 | 224  | 1519 | 1296 | 43.9  | LOC_Os12g17490.1 | 91 | 1094 | 0         | Stripe rust resistance protein Yr10                 |
| Unigene_453 | 550  | 23  | 240  | 548  | 309  | 40.78 | LOC_Os12g17490.1 | 95 | 767  | 0         | Stripe rust resistance protein Yr10                 |
| Unigene_454 | 706  | 28  | 240  | 704  | 465  | 37.85 | LOC_Os12g17490.1 | 95 | 767  | 0         | Stripe rust resistance protein Yr10                 |
| Unigene_455 | 1173 | 96  | 224  | 1171 | 948  | 45.46 | LOC_Os12g17490.1 | 91 | 1273 | 0         | Stripe rust resistance protein Yr10                 |
| Unigene_456 | 1677 | 118 | 224  | 1675 | 1452 | 42.63 | LOC_Os12g17490.1 | 91 | 1094 | 0         | Stripe rust resistance protein Yr10                 |
| Unigene_457 | 394  | 12  | 354  | 1    | 354  | 37.29 | LOC_Os10g04342.1 | 86 | 200  | 2.00E-50  | Stripe rust resistance protein Yr10                 |
| Unigene_458 | 910  | 36  | 732  | 1    | 732  | 45.63 | LOC_Os11g34920.1 | 96 | 1550 | 0         | Stripe rust resistance protein Yr10                 |
| Unigene_459 | 736  | 28  | 556  | 2    | 555  | 43.42 | LOC_Os11g34920.1 | 96 | 1142 | 0         | Stripe rust resistance protein Yr10                 |
| Unigene_460 | 404  | 10  | 328  | 2    | 327  | 71.87 | LOC_Os01g23380.1 | 96 | 680  | 0         | Stripe rust resistance protein Yr10                 |
| Unigene_461 | 205  | 5   | 77   | 205  | 129  | 45.74 | LOC_Os02g19890.3 | 99 | 391  | 1.00E-108 | Stripe rust resistance protein Yr10                 |
| Unigene_462 | 308  | 6   | 184  | 2    | 183  | 43.17 | LOC_Os02g19890.3 | 96 | 511  | 1.00E-144 | Stripe rust resistance protein Yr10                 |
| Unigene_463 | 216  | 4   |      |      |      |       | LOC_Os06g45690.1 | 96 | 54   | 1.00E-06  | Symbiosis-related disease resistance protein        |
| Unigene_464 | 2435 | 302 | 206  | 2278 | 2073 | 42.98 | LOC_Os01g08370.1 | 96 | 2979 | 0         | Symbiosis-related disease resistance protein        |
| Unigene_465 | 3671 | 390 | 1380 | 3107 | 1728 | 47.63 | LOC_Os09g14490.1 | 94 | 4234 | 0         | TIR-NBS type disease resistance protein             |
| Unigene_466 | 3559 | 369 | 1268 | 2995 | 1728 | 47.63 | LOC_Os09g14490.1 | 94 | 4123 | 0         | TIR-NBS type disease resistance protein             |
| Unigene_467 | 366  | 5   | 346  | 236  | 111  | 47.75 | LOC_Os09g14490.1 | 94 | 131  | 1.00E-29  | TIR-NBS type disease resistance protein             |
| Unigene_468 | 333  | 11  | 216  | 1    | 216  | 54.63 | LOC_Os01g06900.1 | 98 | 620  | 1.00E-177 | Verticillium wilt disease resistance protein<br>Ve2 |
| Unigene_469 | 680  | 21  | 679  | 2    | 678  | 46.61 | LOC_Os01g06900.1 | 97 | 1229 | 0         | Verticillium wilt disease resistance protein<br>Ve2 |
| Unigene_470 | 272  | 8   | 260  | 147  | 114  | 43.86 | LOC_Os01g06730.1 | 91 | 188  | 4.00E-47  | Verticillium wilt disease resistance protein        |
| Unigene_471 | 541  | 24  | 2    | 541  | 540  | 41.3  | LOC_Os04g28210.1 | 88 | 87.7 | 2.00E-16  | Verticillium wilt disease resistance protein        |
| Unigene_472 | 240  | 4   | 47   | 199  | 153  | 35.95 | LOC_Os01g06730.1 | 94 | 109  | 3.00E-23  | Verticillium wilt disease resistance protein        |
| Unigene_473 | 553  | 16  | 193  | 552  | 360  | 46.11 | LOC_Os01g06730.1 | 91 | 636  | 0         | Verticillium wilt disease resistance protein        |

---

|             |     |    |    |     |     |       |                  |    |     |           |                                              |
|-------------|-----|----|----|-----|-----|-------|------------------|----|-----|-----------|----------------------------------------------|
| Unigene_474 | 223 | 5  |    |     |     |       | LOC_Os04g28210.1 | 92 | 315 | 2.00E-85  | Verticillium wilt disease resistance protein |
| Unigene_475 | 401 | 15 | 43 | 399 | 357 | 37.54 | LOC_Os04g28210.1 | 94 | 620 | 1.00E-177 | Verticillium wilt disease resistance protein |
| Unigene_476 | 328 | 7  | 81 | 326 | 246 | 40.24 | LOC_Os01g04070.1 | 95 | 539 | 1.00E-152 | Verticillium wilt disease resistance protein |

---
